# Supplementary material for: Cross-reactive memory T cells associate with protection against SARS-CoV-2 infection in COVID-19 contacts
Source: PubMed Central journal article supplement (PMC8748880; doi:10.1038/s41467-021-27674-x), 2022-01-10
Supplement: 41467_2021_27674_MOESM2_ESM.pdf [file 41467_2021_27674_MOESM2_ESM.pdf]

**Description of additional data supplementary data file**

File Name: Supplementary Data 1

Description: A table of accession IDs used in the manuscript analysis.
